# Supplementary material for: Modeling Microtubule-Cytoplasm Interaction in Plant Cells
Source: bioRxiv or medRxiv preprint supplement (doi:10.1101/2022.09.29.510138), 2022-09-30
Supplement: Supplementary file [file media-1.pdf]

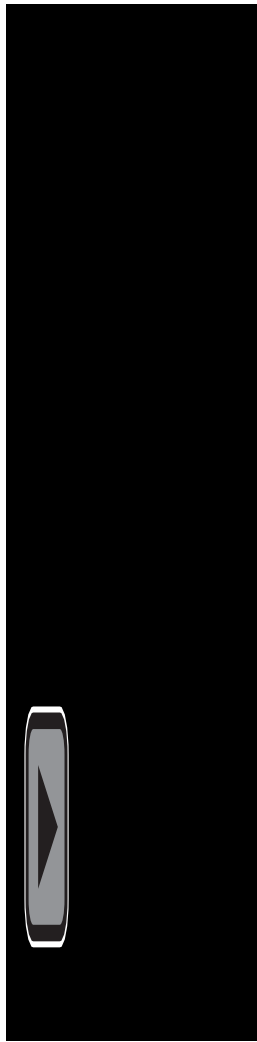

Movie S1

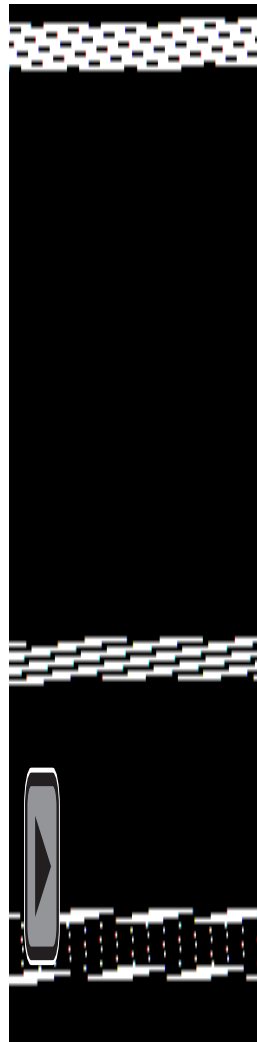

Movie S2

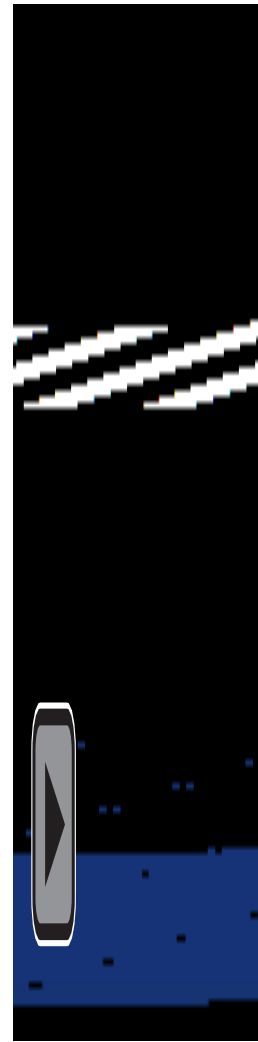

Movie S3

**Movie S1:**

Dynamics of the ST-YFP particles at the cortical cytoplasm of the Arabidopsis etiolated hypocotyl cells. The 2.5-d-old etiolated Arabidopsis seedlings expressing ST-YFP were imaged by confocal microscopy. Time series is 1-s intervals. Total time = 120 s. Frame rate = 20 fps. (Bar = 5  $\mu\text{m}$ .)

**Movie S2:**

Dynamics of the ST-YFP particles at the cortical cytoplasm of the Arabidopsis etiolated hypocotyl cells. The 2.5-d-old etiolated Arabidopsis seedlings expressing ST-YFP were imaged by confocal microscopy after 30min DMSO treatment. Time series is 1-s intervals. Total time = 120 s. Frame rate = 20 fps. (Bar = 5  $\mu\text{m}$ .)

**Movie S3:**

Dynamics of the ST-YFP particles at the cortical cytoplasm of the Arabidopsis etiolated hypocotyl cells. The 2.5-d-old etiolated Arabidopsis seedlings expressing ST-YFP were imaged by confocal microscopy after 30min 2 $\mu\text{M}$  Lat B treatment. Time series is 1-s intervals. Total time = 120 s. Frame rate = 20 fps. (Bar = 5  $\mu\text{m}$ .)
